1  
2  
3  
4  
5  
6  
7  
8  
9  
10  
11  
12  
13  
14  
15  
16  
17  
18  
19  
20  
21  
22

# Title Page

**Title:**

Thoracic Aorta Measurement Extraction from Computed Tomography Radiology Reports Using Instruction Tuned Large Language Models

**Authors:**

Ely Erez<sup>1</sup>, Sedem Dankwa<sup>1</sup>, McKenzie Tuttle<sup>1</sup>, Afsheen Nasir<sup>1</sup>, Prashanth Vallabhajosyula<sup>1</sup>, Eric B. Schneider<sup>2</sup>, Roland Assi<sup>1</sup>, Chin Siang Ong<sup>2,3</sup>

<sup>1</sup>Division of Cardiac Surgery, Yale School of Medicine, New Haven, CT, USA

<sup>2</sup>Department of Surgery, Yale School of Medicine, New Haven, CT, USA

<sup>3</sup>Harvard T.H. Chan School of Public Health, Boston, MA, USA

**Word Count:** 4527

**Corresponding Author:**

Chin Siang Ong, MBBS, PhD  
Assistant Professor of Surgery  
Division of Surgical Outcomes  
Surgery Center for Health Services and Outcomes Research  
Department of Surgery, Yale School of Medicine  
Phone: 203-432-4771  
Email Address: [chinsiang.ong@yale.edu](mailto:chinsiang.ong@yale.edu)

23 **Abstract:**

24 Chest computed tomography (CT) is essential for diagnosing and monitoring thoracic aortic  
25 dilations and aneurysms, conditions that place patients at risk of complications such as aortic  
26 dissection and rupture. However, aortic measurements in chest CT radiology reports are often  
27 embedded in free-text formats, limiting their accessibility for clinical care, quality improvement  
28 and research purposes. In this study, we developed a multi-method pipeline to extract structured  
29 aortic measurements from radiology reports, and compared the performance of fine-tuned  
30 BERT-based models with instruction-tuned Llama large language models (LLMs). Applying the  
31 best-performing method to a real-world large chest CT radiology report database, we generated a  
32 comprehensive aortic measurement dataset that facilitates big data aortic disease research.

33 **Introduction:**

34 Chest computed tomography (CT) is essential for diagnosing and monitoring thoracic aortic  
35 dilations and aneurysms. These conditions, often asymptomatic, significantly increase the risk of  
36 life-threatening complications such as aortic dissection and rupture<sup>1</sup>. Frequently, thoracic aortic  
37 dilations are detected incidentally on chest CTs performed for unrelated clinical indications.  
38 Once diagnosed, chest CTs serve as the preferred modality for tracking aortic diameter changes  
39 over time and guiding surgical decision-making<sup>1</sup>. However, key diagnostic measures, including  
40 aortic diameters, are predominantly documented in free-text CT radiology reports, rendering  
41 them inaccessible in a structured format within most electronic health record systems.

42

43 Extracting these measures in a structured form could make a substantial clinical impact. These  
44 structured data can be used to flag reports with incidental findings within the EHR software,  
45 drawing the attention of physicians and facilitating timely referrals to surgeons. This can prevent  
46 missed findings, improve the quality of care by monitoring referral rates, and adapt to evolving  
47 evidence-based medicine (EBM) guidelines that adjust surgical referral thresholds. Additionally,  
48 healthcare institutions can monitor surgical referral rates and ensure adherence to the most  
49 current EBM, enhancing patient outcomes and healthcare quality. From the research perspective,  
50 extracting these measures retrospectively in a large cohort of patients will enable researchers to  
51 study rates of incidental aortic dilation detection and analyze how aortic diameters evolve over  
52 time in affected patients. This structured data can also provide valuable epidemiological insights  
53 into the prevalence and risk factors associated with thoracic aortic dilations.

54

55 The task of extracting aortic diameters falls within the broader domain of information extraction,  
56 which is commonly addressed using natural language processing (NLP) techniques. Specifically,  
57 it requires word- or token-level classification, akin to named entity recognition (NER), where  
58 specific entities are identified and categorized within text. NER techniques have evolved rapidly  
59 in recent years, transitioning from hand-crafted rule-based approaches to feature-driven  
60 statistical models and, ultimately, to end-to-end deep learning models<sup>2</sup>. As a key application of  
61 NER, Biomedicine has been a central area of research<sup>3</sup>, with extensive work exploring its use in  
62 medical imaging<sup>4</sup>. Early studies relied on hand-crafted rules to identify entity mentions, often  
63 involving complex logic and requiring substantial domain expertise<sup>5,6</sup>. Later work employed  
64 more advanced classical machine learning techniques such as Hidden Markov Models<sup>7</sup>, Support  
65 Vector Machines<sup>8</sup>, and Conditional Random Fields<sup>9</sup>. While these methods improved  
66 performance, they still depended on manual feature extraction, a process heavily reliant on  
67 domain knowledge, as a prerequisite to classification.

68  
69 The advent of deep neural networks marked a paradigm shift in NER. Models such as Recurrent  
70 Neural Networks (RNNs) and Bidirectional Long Short-Term Memory (BiLSTM) networks  
71 achieved state-of-the-art performance while eliminating the need for manual feature engineering,  
72 enabling end-to-end learning directly from raw data. These models, in turn, were rapidly  
73 surpassed by pretrained language models like the Bidirectional Encoder Representations from  
74 Transformers (BERT) model, which leverage encoder-based transformer architectures to set new  
75 benchmarks in NER tasks. BERT and its domain specific variants, such as PubMedBERT<sup>10</sup> and  
76 BioBERT<sup>11</sup>, have become the gold standard in NER. By fine-tuning on pre-labeled datasets, these  
77 models achieve high performance in NER tasks with minimal reliance on additional domain

78 knowledge. These models have been widely adopted by the medical community for information  
79 extraction<sup>3</sup>, including significant effort to improve information extraction from radiology  
80 reports<sup>4</sup>. For instance, Khurshid et al.<sup>12</sup> developed Bio+Discharge Summary BERT, a fine-tuned  
81 BERT model for NER, to extract vital signs such as height, weight, and blood pressure from  
82 unstructured electronic health record (EHR) notes, reducing vital sign data missingness by 31%.  
83 Similarly, Singh et al.<sup>13</sup> addressed a challenge closely related to ours, using a fine-tuned BERT  
84 model to extract 21 quantitative measures from cardiac magnetic resonance imaging. Their  
85 approach achieved a macro-average F1 score of 0.957, highlighting the strong performance of  
86 these models with minimal labeling effort.

87  
88 In recent years generative LLMs such as OpenAI's GPT-3.5 and GPT-4<sup>14</sup>, have transformed the  
89 field of natural language processing, breaking performance records across numerous  
90 benchmarking tasks. These models utilize a Transformer architecture scaled to hundreds of  
91 billions of parameters, enabling unprecedented contextual understanding and fluency in text  
92 generation. The introduction of smaller, open-source LLMs such as Meta's Llama<sup>15</sup>, expanded  
93 research opportunities by making these technologies accessible to the research community  
94 enabling the development of tools for fine-tuning and inference on more modest hardware. The  
95 ability of pretrained LLMs to perform zero-shot<sup>16</sup> and few-shot<sup>17</sup> learning has allowed them to  
96 excel in many NLP tasks without extensive labeled data. Recognizing this potential, researchers  
97 have sought to apply similar approaches to biomedical NER<sup>18,19</sup>, hoping to reduce reliance on  
98 labeled training data while maintaining competitive performance.

99

100 In practice, pretrained LLMs have struggled to match the performance of fine-tuned BERT-  
101 based models on NER tasks<sup>20,21</sup>. Instruction tuning, in contrast, has shown far greater  
102 potential<sup>22,23</sup>. Instruction tuning, or instruction fine-tuning, describes the process by which large  
103 language models undergo supervised fine-tuning to better follow instructions and improve  
104 performance on a given task<sup>24</sup>. An example of this technique is a study by Keloth et al.<sup>25</sup>, who  
105 developed BioNER-Llama 2 by instruction-tuning Llama 2-7B on three publicly available  
106 biomedical NER datasets focusing on diseases, chemicals and genes. BioNER-Llama 2 achieved  
107 performance comparable to fine-tuned PubMedBERT, with F1 scores ranging from 0.949 to  
108 0.956 on the test sets. Similarly, Bian et al.<sup>26</sup> created the VANER model by instruction-tuning  
109 Llama 2-7B on eight biomedical NER datasets, reporting F1 scores between 0.77 and 0.94,  
110 consistent with fine-tuned BERT-based models. Notably, both VANER and BioNER-Llama 2  
111 demonstrated poor generalizability, with significantly reduced performance on previously unseen  
112 datasets. Additionally, these studies primarily focus on benchmark tasks, which, while useful for  
113 assessing baseline capabilities, may not reflect real-world complexities. The real-world  
114 performance of LLMs in NER applications, particularly in the biomedical domain, remains  
115 largely underexplored.

116  
117 The primary objective of this study was to develop an automated machine learning pipeline for  
118 extracting aortic measurements from chest CT radiology reports. To achieve this, we compared  
119 the performance of fine-tuned BERT-based models with generative LLMs. A secondary  
120 objective was to construct a comprehensive aortic measurement database by applying the  
121 pipeline to a large cohort of chest CT radiology reports from our institution. The generated

122 dataset will enable future investigations into patterns of aortic dilation detection and the  
123 progression of aortic disease in a hospital-based population.

124

125 **Methodology:**

126 This study was determined to be exempt from review by Yale University's Institutional Review  
127 Board (IRB) under protocol number 2000037866 on May 3, 2024.

128

129 Dataset

130 We conducted an institutional search for chest CTs with corresponding radiology reports for  
131 patients aged 18 and older, performed between January 2013 and December 2023. The search  
132 encompassed 43 distinct CT protocols and yielded 363,423 radiology reports. Reports from CT  
133 protocols with fewer than 2,000 instances and reports without narrative content were excluded,  
134 resulting in a final dataset of 356,690 radiology reports across 16 CT protocols.

135

136 A subset of 1,506 radiology reports was selected for manual annotation using stratified random  
137 sampling to ensure balanced representation across protocols. This subset was divided into 1,002  
138 reports for training (sampled at a 1:356 ratio) and 504 reports for validation and testing (sampled  
139 at a 1:712 ratio), ensuring that reports in the training set were distinct from the reports used for  
140 validation and testing to prevent information leakage. The narratives were annotated using Label  
141 Studio<sup>27</sup> by two medical students and a postdoctoral researcher with an MD. To ensure  
142 consistency, all annotations were reviewed by the postdoctoral researcher. Thoracic aortic  
143 diameters were labeled at eight anatomical sites: the annulus, sinus of Valsalva, sinotubular

144 junction, mid ascending, ascending proximal to the brachiocephalic, top of the arch, proximal  
145 descending, and mid descending.

146

147 Due to the limited number of aortic diameter annotations identified in the 504 reports intended  
148 for validation and testing (n=289 annotations), the reports designated for both validation and  
149 testing were instead allocated exclusively for validation. To create the testing set, an additional  
150 504 reports were sampled and annotated following the same protocol. Reports selected for  
151 training and validation were excluded from the pool when selecting the test set to avoid data  
152 leakage. This process resulted in 2,010 labeled reports, divided into training, validation, and  
153 testing sets with a 50:25:25 split. Figure 1 provides a flowchart illustrating the dataset selection  
154 process, while Table 1 presents the radiology reports and corresponding patient characteristics  
155 for each set.

156

### 157 Data preprocessing

158 To account for BERT's token limit and ensure a fair comparison with Llama models, we opted to  
159 perform fine-tuning and inference on individual sentences rather than complete narratives.

160 Because most sentences in the report narratives did not contain aortic measurements, splitting the  
161 reports into sentences allowed us to exclude irrelevant content, thereby improving label balance  
162 and significantly reducing fine-tuning and inference times. Sentence splitting was performed  
163 using the Python package NLTK. The first sentence of each report, as well as any sentence  
164 lacking a non-time or date numeric value, was excluded from analysis. Additionally, we retained  
165 only sentences containing at least one aorta-related keyword.

166



167 For fine-tuning BERT-based models, each aortic measurement site was assigned a numeric label  
168 between 1 and 8. Tokens within the span of a measurement were assigned the corresponding  
169 numeric label, while all other tokens were labeled as 0. This numerical vector served as the label  
170 for each sentence. For Llama models we used XML tags to delineate measurements in the target  
171 output, such as <SOV> and </SOV> for the sinus of Valsalva. If no measurements were present,  
172 the output remained identical to the input sentence. This annotation approach, similar to that  
173 employed by Keltoh et al.<sup>25</sup>, facilitates straightforward postprocessing. Figure 2 shows a sample  
174 input and output for Llama models.

175

#### 176 Baseline Model

177 We used Meta's Llama 3.1 instruction-tuned model with 8 billion (8B) parameters as a baseline  
178 model<sup>28</sup>. This 8B model was chosen for its strong benchmark performance relative to its size,  
179 which represents the upper limit of our virtual machine's capacity for local fine-tuning. The  
180 instruction-tuned version was chosen over the base (pre-trained) version because it underwent  
181 several rounds of alignment, including supervised fine-tuning, rejection sampling, and direct  
182 preference optimization, which improved its instruction-following capability, quality, and  
183 safety<sup>29</sup>. The baseline model's performance was further optimized through prompt engineering,  
184 following the methodology described by Hu et al.<sup>19</sup>. The prompt included a task description,  
185 labeling instructions based on the annotation guidelines, and additional instructions informed by  
186 error analysis conducted on the training set. We evaluated the baseline model's zero-shot  
187 performance as well as few-shot performance using three pre-selected annotated samples from  
188 the training set. The selected prompt, as well as several annotated radiology report samples, are  
189 publicly available on GitHub at <https://github.com/yalesurgeryresearch/RadTextExtractor>.

190

## 191 BERT-based Models

192 We fine-tuned six BERT-based models by combining three weight initialization strategies with  
193 two tokenization schemes. The weight initialization strategies included: (1) the original BERT  
194 model<sup>30</sup>, (2) BERT-NER<sup>31</sup>, a variant fine-tuned on the English CoNLL-2003 Named Entity  
195 Recognition dataset<sup>32</sup>, and (3) PubMedBERT<sup>10</sup>, pre-trained on PubMed abstracts and full-text  
196 articles from PubMed Central. The two tokenization schemes tested were: (1) the standard BERT  
197 tokenization and (2) a modified scheme in which numeric values were replaced with the unique  
198 [NUM] pseudo-token<sup>33</sup>.

199

200 Fine-tuning was performed using the `AutoModelForTokenClassification` class from the  
201 HuggingFace transformers library<sup>34</sup>, which adds a token classification head to the BERT  
202 architecture for mapping hidden states to output labels. The fine-tuning process adhered to the  
203 baseline scheme proposed by Mosbach et al.<sup>35</sup>. Each model was fine-tuned on the selected  
204 sentences from the training set over 20 epochs, using categorical cross-entropy loss.  
205 Optimization was conducted with the AdamW<sup>36</sup> optimizer, employing a linear learning rate  
206 scheduler and a 10% warm-up phase. Hyperparameter tuning was conducted using grid search,  
207 testing learning rates of 1e-5, 2e-5, 5e-5 and 1e-4, along with batch sizes of 8, 16, and 32. A  
208 random seed was fixed during training to ensure reproducibility. Loss on the validation set was  
209 calculated after each epoch, and the epoch with the lowest validation loss was selected for each  
210 fine-tuning iteration.

211

## 212 Llama Models

213 We compared the performance of three versions of Meta’s Llama models using instruction-  
214 tuning: the Llama 2 chat-tuned model with 7 billion parameters, the Llama 3 instruction-tuned  
215 model with 8 billion parameters, and the Llama 3.1 instruction-tuned model with 8 billion  
216 parameters. To accommodate the instruction-tuning process on our virtual machine’s limited  
217 GPU RAM, we employed 4-bit Quantized Low-Rank Adaptation (QLoRA)<sup>37</sup>. QLoRA builds on  
218 Low-Rank Adaptation (LoRA)<sup>38</sup>, a technique that significantly reduces the number of trainable  
219 parameters, by further quantizing model weights to 4-bit precision. This approach enables fine-  
220 tuning of large language models on resource-constrained hardware while maintaining high  
221 performance. Additionally, we utilized Unsloth<sup>39</sup>, an open-source library that accelerates fine-  
222 tuning through a custom backpropagation engine.

223  
224 Instruction-tuning for each model used the same prompt as the zero-shot baseline Llama 3.1  
225 model. Instruction-tuning was conducted on sentences from the training set over 5 epochs, using  
226 cross-entropy loss and an AdamW<sup>36</sup> optimizer with a linear rate scheduler without a warm-up  
227 phase. A batch size of 1 was used for all trials. During fine-tuning, we zeroed-out the loss on the  
228 provided prompt, ensuring learning only on the model’s output. Validation loss was calculated  
229 after each epoch, and the epoch with the lowest validation loss was selected for each instruction-  
230 tuning trial. Hyperparameter tuning was performed using grid search to optimize the learning  
231 rate, as well as LoRA’s rank, and alpha parameters. The learning rates tested were 2e-5, 5e-5,  
232 and 1e-4. Rank values included 16, 32, and 64, with alpha values set to rank multiplied by 1 or 2  
233 (e.g., for a rank of 16, the alpha values tested were 16 and 32). Sampling was disabled during  
234 inference to ensure deterministic and reproducible results. When labeling sentences, the model  
235 was provided with the prompt and a sentence as input and generated a labeled output.

236

237 Evaluation metrics

238 Model performance was evaluated on the validation set using exact match macro-averaged

239 precision, recall, and F1 scores across all aortic measurement sites, as well as site-specific

240 precision, recall, and F1 scores. To simplify terminology, macro-averaged precision, recall, and

241 F1 scores are referred to as "macro precision," "macro recall," and "macro F1," respectively.

242 Performance metrics were calculated across the entire validation set, including sentences not

243 selected for inference during preprocessing. The optimal model from the baseline models,

244 BERT-based models, and Llama models was selected based on the highest macro F1 score on the

245 validation set.

246

247 Ablation study

248 To evaluate the impact of training set size on model performance, we conducted an ablation

249 study in which the optimal model was fine-tuned using subsets of 10, 25, 50, and 100 randomly

250 selected sentences from the training set. To mitigate the effects of sentence selection, this process

251 was repeated five times, each time using a different random seed to generate distinct sentence

252 subsets. The median macro F1 score across the five trials was then compared to the performance

253 of the model trained on the full training set.

254

255 Following the ablation study, we evaluated the optimal model on the test set to assess its

256 generalizability and potential real-world performance. Finally, inference was conducted on the

257 entire radiology report cohort to create an aortic measurement database. This process was limited

258 to sentences selected according to the criteria outlined in the preprocessing phase. Measurement

259 extraction rates, aortic dilation rates, and aortic diameter median and interquartile range (IQR) at  
260 each measurement site were analyzed as supplementary indicators of the model's real-world  
261 performance.

262

### 263 Computational Resources and Framework

264 All analyses were conducted on a HIPAA-compliant virtual machine hosted by Yale's Spinup  
265 service, utilizing Amazon Elastic Cloud Compute (EC2). The environment comprised an  
266 Amazon AWS G4 instance with 4 vCPUs, 16 GB of RAM, and an NVIDIA T4 GPU with 16 GB  
267 of GPU memory. GPU acceleration was facilitated using CUDA (v12.4). Fine-tuning and  
268 inference were performed using Python (v3.9.13) with the following key libraries: PyTorch  
269 (v2.3.0), Hugging Face Transformers (v4.43.3), and Unsloth (v2024.8).

270

271 The code for data preprocessing, model fine-tuning, and evaluation is available in a GitHub  
272 repository at <https://github.com/yalesurgeryresearch/RadTextExtractor>. Due to the presence of  
273 protected health information in the radiology reports, the datasets generated and analyzed in this  
274 study, along with the fine-tuned models, are not publicly available. However, they can be  
275 obtained from the corresponding author upon reasonable request, in accordance with institutional  
276 policies and any applicable data access agreements.

277

### 278 **Results:**

279 Following preprocessing, the training dataset used for fine-tuning consisted of 214 out of 19,844  
280 sentences (1.08%), of which 166 (77.6%) contained at least one annotation. The training set  
281 included a total of 589 annotations, with a median of 52 annotations per measurement site

282 (range: 44 to 166). The validation set contained 103 out of 9,505 sentences (1.08%) selected for  
283 inference, of which 71 (68.9%) included at least one annotation. All sentences with annotations  
284 in the validation set were included in the inference subset, which had a total of 289 annotations,  
285 with a median of 25.5 annotations per measurement site (range: 20 to 76). The test set comprised  
286 91 out of 9,664 sentences (0.94%) selected for inference, with 68 (74.7%) containing at least one  
287 annotation. Similar to the validation set, all sentences with annotations in the test set were  
288 included in the inference subset, which contained 215 annotations, with a median of 18  
289 annotations per measurement site (range: 13 to 69). A summary of the annotation characteristics  
290 for the training, validation, and test datasets after preprocessing is provided in Table 2.

291

### 292 Model Performance Comparison

293 The performance of the baseline Llama 3.1 models, fine-tuned BERT-based models, and  
294 instruction-tuned Llama models on the validation set is summarized in Table 3. The few-shot  
295 Llama 3.1 was the best performing baseline model, besting the zero-shot model with a macro F1  
296 score of 0.838 compared to 0.663. However, both baseline models were surpassed by all fine-  
297 tuned BERT-based models and instruction-tuned Llama models.

298

299 The best performance among the BERT-based models was achieved by the fine-tuned  
300 PubMedBERT with [NUM] tokenization, which attained a macro F1 score of 0.945. Numeric  
301 tokenization using a [NUM] pseudo-token consistently outperformed the standard tokenization  
302 technique across all three models, and the fine-tuned PubMedBERT was the best performing  
303 model in both the standard and [NUM] tokenization.

304

305 The instruction-tuned Llama 3.1 delivered the highest overall performance, achieving a near-  
306 perfect macro F1 score of 0.992, with a macro precision of 0.993 and macro recall of 0.992. The  
307 instruction-tuned Llama 3 followed closely with a macro F1 score of 0.982. Notably, the  
308 instruction-tuned Llama 2 achieved a macro F1 of 0.839, performance comparable to the few-  
309 shot baseline model and significantly lower than the top-performing BERT-based models.

310  
311 Figure 3 compares the distributions of F1 scores across measurement sites for the few-shot  
312 Llama 3.1, PubMedBERT with [NUM] tokenization, and the instruction-tuned Llama 3.1. The  
313 few-shot Llama 3.1 and PubMedBERT models showed significant variability in F1 scores across  
314 different measurement sites. In contrast, the instruction-tuned Llama 3.1 demonstrated consistent  
315 performance, achieving an F1 score of at least 0.971 across all sites.

316

### 317 Impact of Training Set Size

318 Figure 4 shows the results of the ablation study, with macro F1 scores of the instruction-tuned  
319 Llama 3.1 model as a function of the number of training sentences. Performance improved  
320 rapidly with the initial increase in training sentences but slowed and eventually plateaued as the  
321 number grew. Median macro F1 scores were 0.800 with 10 training sentences, 0.880 with 20,  
322 0.903 with 50, and 0.971 with 100, compared to 0.992 when using the full training set of 214  
323 sentences. The results also highlight significant variability in performance due to the random  
324 selection of sentence subsets, which decreased as the training set size increased.

325

### 326 Assessing Model Generalizability

327 The performance of the instruction-tuned Llama 3.1 model was evaluated on the test set to assess  
328 its generalizability to unseen data sampled from the same source distribution. Table 4 compares  
329 the model's performance across aortic measurement sites between the validation and test sets.  
330 The macro F1 score on the test set was 0.970, slightly lower than the 0.992 achieved on the  
331 validation set. Measurement site F1 scores ranged from 0.923 to 1.000 on the test set, compared  
332 to 0.971 to 1.000 on the validation set.

333

### 334 Insights from Full Dataset Extraction

335 The complete chest CT radiology report dataset consisted of 356,690 reports from 140,645  
336 unique patients. Following preprocessing, 74,483 sentences out of 6,960,729 (approximately  
337 1.07%) were selected for extraction, consistent with the proportions observed in the labeled  
338 datasets. After extraction using the instruction-tuned Llama 3.1, 49,387 radiology reports  
339 (13.85%) contained at least one aortic measurement, showing higher rates of aortic measurement  
340 reporting in males (18.51%) compared to females (9.50%). Table 5 summarizes the extraction  
341 results by aortic measurement site. Measurement extraction rates across the aortic sites were  
342 similar to those in the labeled datasets (Table 2).

343

344 The largest median diameters were observed at the mid ascending aorta and the sinus of  
345 Valsalva, measuring 39 mm (IQR 36–42) and 36 mm (IQR 32–40), respectively. Median  
346 diameters decreased distally along the aorta, measuring 31 mm (IQR 28–34) at the aortic arch,  
347 30 mm (IQR 27–34) at the proximal descending aorta, and 29 mm (IQR 25–34) at the mid  
348 descending aorta. Ascending aortic dilation of at least 40 mm was reported in 8.69% of patients



349 (12,228/140,645), with 2.27% (3,193/140,645) reported to have a dilation of at least 45 mm,  
350 0.66% (925/140,645) at least 50 mm, and 0.28% (393/140,645) at least 55 mm.

351

## 352 **Discussion:**

353 In this study, we describe our experiences developing a machine learning pipeline for extracting  
354 aortic measurements from chest CT radiology reports. Among the models evaluated, the  
355 instruction-tuned Llama 3.1 outperformed both the BERT-based models and the pretrained  
356 Llama 3.1 baseline, achieving macro F1 scores of 0.992 on the validation set and 0.970 on the  
357 test set. PubMedBERT achieved the best performance among the BERT-based models,  
358 suggesting that pre-training on medical literature, making it better suited for understanding and  
359 processing medical texts, such as chest CT radiology reports. The effectiveness of [NUM]  
360 tokenization is likely attributed to its consistent numerical tokenization compared as compared to  
361 the standard BERT WordPiece tokenizer, which fragments numerical expressions requiring that  
362 all fragments be correctly tagged<sup>33</sup>. Among the Llama-based models, the instruction-tuned Llama  
363 3.1 significantly outperformed the Llama 2 chat-tuned model and was marginally better than the  
364 Llama 3 instruction-tuned model. Meta attributes Llama 3.1's superior performance to its  
365 enhanced reasoning capabilities and improved context length<sup>29</sup>. These improvements appear to  
366 have carried over in instruction-tuning, which allowed it to better handle the complexities of the  
367 dataset and achieve higher accuracy in extracting aortic measurements from chest CT radiology  
368 reports.

369

370 When applied to our extensive radiology report database, the model successfully extracted aortic  
371 measurements from 13.85% of reports, a rate consistent with both our labeled subset and prior

372 work assessing aortic measurement reporting in CT radiology reports<sup>40</sup>. The extracted aortic  
373 measurements and dilation rates similarly aligned with findings from previous studies<sup>41,42</sup>. The  
374 resulting aortic measurement database is one of the largest of its kind, encompassing  
375 measurements from nearly 50,000 CT scans and over 28,000 patients, representing a valuable  
376 resource for advancing the study of aortic disease.

377  
378 Initial enthusiasm for the potential of large language models (LLMs) in named entity recognition  
379 (NER) has recently been tempered. The expectation that general-domain LLMs could achieve  
380 domain-specific NER through in-context learning has been challenged by multiple studies, where  
381 fine-tuned BERT-based models consistently outperform LLMs<sup>20,21,23</sup>. Even with instruction-  
382 tuning, LLMs have, at best, matched the performance of BERT-based models—a disappointing  
383 outcome given their significantly larger parameter counts and the associated higher costs of fine-  
384 tuning and inference<sup>23,25,26</sup>. Researchers have suggested that the relatively poor NER  
385 performance of LLMs may stem from the limitations of their decoder-only transformer  
386 architecture and next-token prediction pretraining objective, compared to BERT’s encoder-only  
387 architecture and masked language modeling pretraining objective<sup>43</sup>. Our findings, however,  
388 challenge this hypothesis. In our study, the instruction-tuned Llama 3.1 achieved near-perfect  
389 performance on the NER task, surpassing the fine-tuned BERT-based models by what we  
390 consider a substantial margin. In addition to its fantastic performance, Llama 3.1 offers several  
391 additional advantages over BERT, including a much larger context length for analyzing longer  
392 text segments and more human-interpretable outputs, which streamline error analysis.

393

394 Despite these excellent results, additional work is needed to discern whether instruction-tuned  
395 generative LLMs have become the new gold standard for NER. Our findings are based on a  
396 single dataset, and the observed differences might be attributed to suboptimal fine-tuning of the  
397 BERT models, rather than the inherent superiority of the Llama 3 architecture. Further studies  
398 replicating these results across additional NER datasets is essential to substantiate these claims.  
399 Nonetheless, the ability of Llama 3 models to achieve this level of performance suggests that  
400 instruction-tuned generative LLMs hold significant promise for NER and could play a valuable  
401 role in clinical NER.

402  
403 A significant advantage of our proposed methodology is its adaptability. The framework is  
404 agnostic to both the entities being extracted and the domain, enabling straightforward adaptations  
405 to various NER tasks. Instruction-tuning requires relatively few annotated samples, and open-  
406 source annotation tools such as Label Studio facilitate efficient, collaborative annotation  
407 processes. Frameworks like Hugging Face’s Transformers library offer well-developed pipelines  
408 for instruction-tuning general-domain LLMs, making them easily adaptable to diverse tasks.  
409 However, several barriers remain to the broader adoption of these techniques. LLMs still demand  
410 substantial computational resources for training and inference. For clinical projects, the  
411 additional requirement for HIPAA-compliant hardware introduces further costs and complexity.  
412 While existing pipelines are robust, they often require advanced coding and machine learning  
413 expertise, which may be beyond the scope of many clinical researchers. As the field of LLMs  
414 continues to evolve, these barriers are likely to diminish. Companies such as Microsoft and  
415 OpenAI are actively developing HIPAA-compliant implementations of their LLMs, and costs are  
416 expected to decrease as competition increases and the technology matures. If these trends persist,

417 we anticipate that access to LLM instruction-tuning will become increasingly democratized,  
418 empowering clinical researchers to leverage these powerful tools.

419  
420 Our study has several limitations. Both the validation and test sets are relatively small, with few  
421 annotations, making the results susceptible to variability as one or two errors can significantly  
422 impact model performance. Additionally, selecting a subset of sentences for inference may have  
423 led to the omission of relevant sentences when extracting measurements from the complete  
424 radiology report dataset. The BERT-based models used in our analysis are known to be sensitive  
425 to seed values<sup>44</sup>, which may have influenced their performance. Another limitation is the  
426 potential lack of generalizability to newly collected data. The validation and test sets share a  
427 temporal distribution with the training set, and medical data is prone to domain drift over time<sup>45</sup>.  
428 This could limit the applicability of our findings to datasets collected in different time periods or  
429 settings. We believe these limitations do not detract significantly from the overall value of our  
430 findings. Replication of our study in different datasets and settings is needed to validate our  
431 results and confirm the generalizability of our approach.

432

### 433 **Conclusion:**

434 In this study, we developed and evaluated a machine learning pipeline for extracting aortic  
435 measurements from chest CT radiology reports. The instruction-tuned Llama model achieved the  
436 best performance, surpassing state-of-the-art BERT-based models. Using this pipeline, we  
437 created a large, comprehensive database of aortic measurements from radiology reports, offering  
438 a valuable resource for aortic research. Our results highlight the potential of instruction-tuned  
439 generative LLMs in the NER domain, with a generalizable workflow that requires few labeled

440 samples and modest computational resources. As the technology matures, this process is  
441 expected to become even more streamlined, enabling broader adoption in clinical research.

442

#### 443 **Acknowledgments**

444 R.A. discloses support for the research of this work from the Yale Department of Surgery and the  
445 National Heart, Lung, and Blood Institute (NHLBI) of the National Institutes of Health (NIH)  
446 [grant number R01HL168473].

447

#### 448 **Competing Interests**

449 All authors declare no financial or non-financial competing interests.

450

#### 451 **Author Contributions**

452 Conceptualization: EE, CSO, RA.

453 Data Curation: EE, SD, MT, AN.

454 Formal Analysis: EE.

455 Investigation: EE.

456 Methodology: EE, CSO.

457 Project Administration: EE, CSO.

458 Resources: EBS, CSO.

459 Supervision: RA, CSO.

460 Writing – Original Draft: EE, CSO.

461 Writing – Review & Editing: CSO, RA, PV, EBS.

462 All authors reviewed the manuscript.

463

#### 464 **Data Availability**

465 Study data are available upon reasonable request from the corresponding author, in accordance  
466 with institutional policies and any applicable data sharing or data use agreements.

467

#### 468 **Code Availability**

469 The code used in this study is open source and freely available under the MIT license. It can be  
470 accessed on GitHub at <https://github.com/yalesurgeryresearch/RadTextExtractor/>. This  
471 repository includes detailed documentation and examples to facilitate reproducibility and  
472 adaptation for related research.

473

#### 474 **References:**

- 475 1. Isselbacher, E. M. *et al.* 2022 ACC/AHA Guideline for the Diagnosis and Management of  
476 Aortic Disease: A Report of the American Heart Association/American College of  
477 Cardiology Joint Committee on Clinical Practice Guidelines. *Circulation* **146**, e334–e482  
478 (2022).
- 479 2. Munnangi, M. A Brief History of Named Entity Recognition. Preprint at  
480 <https://doi.org/10.48550/arXiv.2411.05057> (2024).
- 481 3. Nunes, M., Bone, J., Ferreira, J. C. & Elvas, L. B. Health Care Language Models and Their  
482 Fine-Tuning for Information Extraction: Scoping Review. *JMIR Med. Inform.* **12**, e60164  
483 (2024).
- 484 4. Hu, M. *et al.* Advancing medical imaging with language models: featuring a spotlight on  
485 ChatGPT. *Phys. Med. Biol.* **69**, 10TR01 (2024).
- 486 5. Tsuruoka, Y. & Tsujii, J. Boosting precision and recall of dictionary-based protein name  
487 recognition. in *Proceedings of the ACL 2003 workshop on Natural language processing in*

- 488 *biomedicine - Volume 13* 41–48 (Association for Computational Linguistics, USA, 2003).  
489 doi:10.3115/1118958.1118964.
- 490 6. Hanisch, D., Fundel, K., Mevissen, H.-T., Zimmer, R. & Fluck, J. ProMiner: rule-based  
491 protein and gene entity recognition. *BMC Bioinformatics* **6**, S14 (2005).
- 492 7. Collier, N., Nobata, C. & Tsujii, J. Extracting the names of genes and gene products with a  
493 hidden Markov model. in *Proceedings of the 18th conference on Computational linguistics -*  
494 *Volume 1* 201–207 (Association for Computational Linguistics, USA, 2000).  
495 doi:10.3115/990820.990850.
- 496 8. Kazama, J., Makino, T., Ohta, Y. & Tsujii, J. Tuning support vector machines for biomedical  
497 named entity recognition. in *Proceedings of the ACL-02 workshop on Natural language*  
498 *processing in the biomedical domain - Volume 3* 1–8 (Association for Computational  
499 Linguistics, USA, 2002). doi:10.3115/1118149.1118150.
- 500 9. Settles, B. Biomedical named entity recognition using conditional random fields and rich  
501 feature sets. in *Proceedings of the International Joint Workshop on Natural Language*  
502 *Processing in Biomedicine and its Applications* 104–107 (Association for Computational  
503 Linguistics, USA, 2004).
- 504 10. Gu, Y. *et al.* Domain-Specific Language Model Pretraining for Biomedical Natural  
505 Language Processing. *ACM Trans. Comput. Healthc.* **3**, 1–23 (2022).
- 506 11. Lee, J. *et al.* BioBERT: a pre-trained biomedical language representation model for  
507 biomedical text mining. *Bioinformatics* **36**, 1234–1240 (2020).
- 508 12. Khurshid, S. *et al.* Cohort design and natural language processing to reduce bias in electronic  
509 health records research. *Npj Digit. Med.* **5**, 1–14 (2022).

- 510 13. Singh, P. *et al.* One Clinician Is All You Need—Cardiac Magnetic Resonance Imaging  
511 Measurement Extraction: Deep Learning Algorithm Development. *JMIR Med. Inform.* **10**,  
512 e38178 (2022).
- 513 14. OpenAI *et al.* GPT-4 Technical Report. Preprint at  
514 <https://doi.org/10.48550/arXiv.2303.08774> (2024).
- 515 15. Touvron, H. *et al.* LLaMA: Open and Efficient Foundation Language Models. Preprint at  
516 <https://doi.org/10.48550/arXiv.2302.13971> (2023).
- 517 16. Kojima, T., Gu, S. (Shane), Reid, M., Matsuo, Y. & Iwasawa, Y. Large Language Models  
518 are Zero-Shot Reasoners. *Adv. Neural Inf. Process. Syst.* **35**, 22199–22213 (2022).
- 519 17. Brown, T. B. *et al.* Language Models are Few-Shot Learners. Preprint at  
520 <https://doi.org/10.48550/arXiv.2005.14165> (2020).
- 521 18. Agrawal, M., Hegselmann, S., Lang, H., Kim, Y. & Sontag, D. Large Language Models are  
522 Few-Shot Clinical Information Extractors. Preprint at  
523 <https://doi.org/10.48550/arXiv.2205.12689> (2022).
- 524 19. Hu, Y. *et al.* Improving large language models for clinical named entity recognition via  
525 prompt engineering. *J. Am. Med. Inform. Assoc.* ocad259 (2024) doi:10.1093/jamia/ocad259.
- 526 20. Wang, S. *et al.* GPT-NER: Named Entity Recognition via Large Language Models. Preprint  
527 at <https://doi.org/10.48550/arXiv.2304.10428> (2023).
- 528 21. Xie, T. *et al.* Empirical Study of Zero-Shot NER with ChatGPT. Preprint at  
529 <https://doi.org/10.48550/arXiv.2310.10035> (2023).
- 530 22. Chen, Q. *et al.* A systematic evaluation of large language models for biomedical natural  
531 language processing: benchmarks, baselines, and recommendations. Preprint at  
532 <https://doi.org/10.48550/arXiv.2305.16326> (2024).



- 533 23. Xu, D. *et al.* Large Language Models for Generative Information Extraction: A Survey.  
534 Preprint at <https://doi.org/10.48550/arXiv.2312.17617> (2024).
- 535 24. Wei, J. *et al.* Finetuned Language Models Are Zero-Shot Learners. Preprint at  
536 <https://doi.org/10.48550/arXiv.2109.01652> (2022).
- 537 25. Keloth, V. K. *et al.* Advancing entity recognition in biomedicine via instruction tuning of  
538 large language models. *Bioinformatics* **40**, btae163 (2024).
- 539 26. Biana, J., Zhai, W., Huang, X., Zheng, J. & Zhu, S. VANER: Leveraging Large Language  
540 Model for Versatile and Adaptive Biomedical Named Entity Recognition. Preprint at  
541 <https://doi.org/10.48550/arXiv.2404.17835> (2024).
- 542 27. Tkachenko, M., Malyuk, M., Holmanyuk, A. & Liubimov, N. Label Studio: Data labeling  
543 software. (2020).
- 544 28. Dubey, A. *et al.* The Llama 3 Herd of Models. Preprint at  
545 <https://doi.org/10.48550/arXiv.2407.21783> (2024).
- 546 29. Introducing Llama 3.1: Our most capable models to date. *Meta AI*  
547 <https://ai.meta.com/blog/meta-llama-3-1/>.
- 548 30. Devlin, J., Chang, M.-W., Lee, K. & Toutanova, K. BERT: Pre-training of Deep  
549 Bidirectional Transformers for Language Understanding. Preprint at  
550 <https://doi.org/10.48550/arXiv.1810.04805> (2019).
- 551 31. Lim, David. dslim/bert-base-NER · Hugging Face. <https://huggingface.co/dslim/bert-base->  
552 [ner](https://huggingface.co/dslim/bert-base-ner) (2024).
- 553 32. Sang, E. F. T. K. & Meulder, F. D. Introduction to the CoNLL-2003 Shared Task: Language-  
554 Independent Named Entity Recognition. Preprint at  
555 <https://doi.org/10.48550/arXiv.cs/0306050> (2003).

- 556 33. Loukas, L. *et al.* FiNER: Financial Numeric Entity Recognition for XBRL Tagging. Preprint  
557 at <https://doi.org/10.48550/arXiv.2203.06482> (2022).
- 558 34. Wolf, T. *et al.* HuggingFace’s Transformers: State-of-the-art Natural Language Processing.  
559 Preprint at <https://doi.org/10.48550/arXiv.1910.03771> (2020).
- 560 35. Mosbach, M., Andriushchenko, M. & Klakow, D. On the Stability of Fine-tuning BERT:  
561 Misconceptions, Explanations, and Strong Baselines. Preprint at  
562 <https://doi.org/10.48550/arXiv.2006.04884> (2021).
- 563 36. Loshchilov, I. & Hutter, F. Decoupled Weight Decay Regularization. Preprint at  
564 <https://doi.org/10.48550/arXiv.1711.05101> (2019).
- 565 37. Dettmers, T., Pagnoni, A., Holtzman, A. & Zettlemoyer, L. QLoRA: Efficient Finetuning of  
566 Quantized LLMs. *Adv. Neural Inf. Process. Syst.* **36**, 10088–10115 (2023).
- 567 38. Hu, E. J. *et al.* LoRA: Low-Rank Adaptation of Large Language Models. Preprint at  
568 <https://doi.org/10.48550/arXiv.2106.09685> (2021).
- 569 39. Daniel Han and Michael Han. unslothai/unsloth. Unsloth AI (2024).
- 570 40. Zamirpour, S. *et al.* Sex differences in ascending aortic size reporting and growth on chest  
571 computed tomography and magnetic resonance imaging. *Clin. Imaging* **105**, 110021 (2024).
- 572 41. Benedetti, N. & Hope, M. D. Prevalence and Significance of Incidentally Noted Dilation of  
573 the Ascending Aorta on Routine Chest Computed Tomography in Older Patients. *J. Comput.*  
574 *Assist. Tomogr.* **39**, 109 (2015).
- 575 42. Mori, M. *et al.* Prevalence of Incidentally Identified Thoracic Aortic Dilations: Insights for  
576 Screening Criteria. *Can. J. Cardiol.* **35**, 892–898 (2019).
- 577 43. Lu, Q. *et al.* Large Language Models Struggle in Token-Level Clinical Named Entity  
578 Recognition. Preprint at <https://doi.org/10.48550/arXiv.2407.00731> (2024).

- 579 44. Dodge, J. *et al.* Fine-Tuning Pretrained Language Models: Weight Initializations, Data  
580 Orders, and Early Stopping. Preprint at <https://doi.org/10.48550/arXiv.2002.06305> (2020).
- 581 45. Guo, L. L. *et al.* Systematic Review of Approaches to Preserve Machine Learning  
582 Performance in the Presence of Temporal Dataset Shift in Clinical Medicine. *Appl. Clin.*  
583 *Inform.* **12**, 808–815 (2021).
- 584

585 **Tables:**

586 **Table 1. Train, validation and test dataset radiology report characteristics**

|                                                            | <b>Train</b> | <b>Validation</b> | <b>Test</b> |
|------------------------------------------------------------|--------------|-------------------|-------------|
| Radiology reports (N)                                      | 1002         | 504               | 504         |
| CT type (n [%])                                            |              |                   |             |
| CT chest without IV contrast                               | 288 [28.7]   | 144 [28.6]        | 144 [28.6]  |
| CT chest with IV contrast                                  | 196 [19.6]   | 98 [19.4]         | 98 [19.4]   |
| CTA chest (PE) with IV contrast                            | 172 [17.2]   | 86 [17.1]         | 86 [17.1]   |
| CT chest, abdomen, pelvis with IV contrast                 | 157 [15.7]   | 79 [15.7]         | 79 [15.7]   |
| CT ED chest, abdomen, pelvis with IV contrast              | 27 [2.7]     | 14 [2.8]          | 14 [2.8]    |
| CTA chest, abdomen, pelvis with and/or without IV contrast | 24 [2.4]     | 12 [2.4]          | 12 [2.4]    |
| CT chest, abdomen, pelvis without IV contrast              | 22 [2.2]     | 11 [2.2]          | 11 [2.2]    |
| CTA chest with and/or without IV contrast                  | 18 [1.8]     | 9 [1.8]           | 9 [1.8]     |
| CT chest without IV contrast, high resolution              | 17 [1.7]     | 9 [1.8]           | 9 [1.8]     |
| CTA chest, abdomen with and/or without IV contrast         | 16 [1.6]     | 8 [1.6]           | 8 [1.6]     |
| CTA coronary                                               | 16 [1.6]     | 8 [1.6]           | 8 [1.6]     |
| CT initial lung cancer screening                           | 12 [1.2]     | 6 [1.2]           | 6 [1.2]     |
| CT cardiac scoring without IV contrast                     | 12 [1.2]     | 6 [1.2]           | 6 [1.2]     |
| CT subsequent lung cancer screening                        | 11 [1.1]     | 6 [1.2]           | 6 [1.2]     |
| CT thoracic spine without IV contrast                      | 7 [0.7]      | 4 [0.8]           | 4 [0.8]     |
| CTA chest vascular with and/or without IV contrast/gated   | 7 [0.7]      | 4 [0.8]           | 4 [0.8]     |
| Age (median [IQR])                                         | 66 [55-75]   | 65 [54-75]        | 66 [54-76]  |
| Females (n [%])                                            | 490 [48.9]   | 272 [54.0]        | 259 [51.4]  |
| Race                                                       |              |                   |             |
| White                                                      | 778 [77.6]   | 384 [76.2]        | 382 [75.8]  |
| Black or African American                                  | 117 [11.7]   | 67 [13.3]         | 78 [15.5]   |
| Asian                                                      | 11 [1.1]     | 4 [0.8]           | 8 [1.6]     |
| American Indian or Native American                         | 1 [0.1]      | 1 [0.2]           | 2 [0.4]     |
| Native Hawaiian or Other Pacific Islander                  | 2 [0.2]      | 3 [0.6]           | 1 [0.2]     |
| Other                                                      | 67 [6.7]     | 31 [6.2]          | 28 [5.6]    |
| Missing                                                    | 20 [2.0]     | 12 [2.4]          | 5 [1.0]     |

587

588 **Table 2. Train, validation and test dataset annotation characteristics following**  
 589 **preprocessing**

|                                                        | <b>Train</b> | <b>Validation</b> | <b>Test</b> |
|--------------------------------------------------------|--------------|-------------------|-------------|
| Sentences in analysis (N)                              | 214          | 103               | 91          |
| Sentences with at least one annotation (n [%])         | 166 [77.6]   | 71 [68.9]         | 68 [74.7]   |
| Sentences with annotations by measurement site (n [%]) |              |                   |             |
| Annulus                                                | 25 [11.7]    | 13 [12.6]         | 10 [11.0]   |
| Sinus of Valsalva                                      | 43 [20.1]    | 23 [22.3]         | 17 [18.7]   |
| Sinotubular junction                                   | 27 [12.6]    | 13 [12.6]         | 9 [9.9]     |
| Mid ascending                                          | 137 [64.0]   | 60 [58.3]         | 59 [64.8]   |
| Ascending proximal to brachiocephalic                  | 27 [12.6]    | 13 [12.6]         | 9 [9.9]     |
| Top of Arch                                            | 32 [15.0]    | 17 [16.5]         | 12 [13.2]   |
| Proximal descending                                    | 34 [15.9]    | 12 [11.7]         | 12 [13.2]   |
| Mid Descending                                         | 40 [18.7]    | 20 [19.4]         | 14 [15.4]   |
| Total annotations (N)                                  | 589          | 289               | 215         |
| Annotation counts by measurement site (n [%])          |              |                   |             |
| Annulus                                                | 49 [8.3]     | 26 [9.0]          | 20 [9.3]    |
| Sinus of Valsalva                                      | 120 [20.4]   | 64 [22.1]         | 47 [21.9]   |
| Sinotubular junction                                   | 44 [7.5]     | 22 [7.6]          | 13 [6.0]    |
| Mid ascending                                          | 166 [28.2]   | 76 [26.3]         | 69 [32.1]   |
| Ascending proximal to brachiocephalic                  | 44 [7.5]     | 22 [7.6]          | 13 [6.0]    |
| Top of Arch                                            | 49 [8.3]     | 29 [10.0]         | 17 [7.9]    |
| Proximal descending                                    | 55 [9.3]     | 20 [6.9]          | 17 [7.9]    |
| Mid Descending                                         | 62 [10.5]    | 30 [10.4]         | 19 [8.8]    |

590

591 **Table 3. Comparison of model performance on validation set.**

| Model                          | Macro-averaged evaluation metric |              |              |
|--------------------------------|----------------------------------|--------------|--------------|
|                                | Precision                        | Recall       | F1           |
| <i>Baseline</i>                |                                  |              |              |
| Zero-shot Llama 3.1            | 0.898                            | 0.535        | 0.663        |
| Few-shot Llama 3.1             | 0.792                            | 0.903        | 0.838        |
| <i>Fine-tuned BERT</i>         |                                  |              |              |
| Fine-tuned BERT                | 0.832                            | 0.880        | 0.851        |
| Fine-tuned PubMedBERT          | 0.901                            | 0.940        | 0.919        |
| Fine-tuned BERT-NER            | 0.868                            | 0.942        | 0.902        |
| Fine-tuned BERT + [Num]        | 0.855                            | 0.895        | 0.870        |
| Fine-tuned PubMedBERT + [Num]  | 0.940                            | 0.956        | 0.945        |
| Fine-tuned BERT-NER + [Num]    | 0.923                            | 0.944        | 0.931        |
| <i>Instruction-tuned Llama</i> |                                  |              |              |
| Instruction-tuned Llama 2      | 0.826                            | 0.853        | 0.839        |
| Instruction-tuned Llama 3      | 0.973                            | <b>0.994</b> | 0.982        |
| Instruction-tuned Llama 3.1    | <b>0.993</b>                     | 0.992        | <b>0.992</b> |

592 Numbers in bold represent best performance per evaluation metric.

593 **Table 4. Fine-tuned Llama 3.1 performance on validation and test sets by aortic**  
 594 **measurement site.**

| Measurement site                      | Validation set |              |              | Test set     |              |              |
|---------------------------------------|----------------|--------------|--------------|--------------|--------------|--------------|
|                                       | Precision      | Recall       | F1           | Precision    | Recall       | F1           |
| Annulus                               | 1.000          | 1.000        | 1.000        | 1.000        | 1.000        | 1.000        |
| Sinus of Valsalva                     | 1.000          | 1.000        | 1.000        | 1.000        | 1.000        | 1.000        |
| Sinotubular junction                  | 1.000          | 1.000        | 1.000        | 0.857        | 1.000        | 0.923        |
| Mid ascending                         | 1.000          | 0.973        | 0.986        | 1.000        | 0.985        | 0.992        |
| Ascending proximal to brachiocephalic | 1.000          | 1.000        | 1.000        | 0.929        | 1.000        | 0.963        |
| Top of arch                           | 1.000          | 0.962        | 0.980        | 1.000        | 1.000        | 1.000        |
| Proximal descending                   | 0.944          | 1.000        | 0.971        | 0.938        | 0.938        | 0.938        |
| Mid descending                        | 1.000          | 1.000        | 1.000        | 0.900        | 1.000        | 0.947        |
| <b>Macro- averaged</b>                | <b>0.993</b>   | <b>0.993</b> | <b>0.992</b> | <b>0.953</b> | <b>0.990</b> | <b>0.970</b> |

595 Numbers in bold represent best performance per evaluation metric.

596

597 **Table 5. Complete dataset inference results by aortic measurement site.**

| Measurement Site                      | Reports with measurements (n) | Percent of sentences analyzed with measurements (%) | Max Diameter (mm, median [IQR]) |
|---------------------------------------|-------------------------------|-----------------------------------------------------|---------------------------------|
| Annulus                               | 7,072                         | 9.49%                                               | 28 [25.7-30.3]                  |
| Sinus of Valsalva                     | 12,620                        | 16.94%                                              | 36 [32-40]                      |
| Sinotubular junction                  | 7,621                         | 10.23%                                              | 34 [30-37]                      |
| Mid ascending                         | 44,472                        | 59.71%                                              | 39 [36-42]                      |
| Ascending proximal to brachiocephalic | 8,056                         | 10.82%                                              | 35 [32-39]                      |
| Top of arch                           | 9,865                         | 13.24%                                              | 31 [28-34]                      |
| Proximal descending                   | 8,886                         | 11.93%                                              | 30 [27-34]                      |
| Mid descending                        | 13,939                        | 18.71%                                              | 29 [25-34]                      |

598

599 **Figure Legends:**

600 Figure 1: Flowchart illustrating the selection and annotation process of radiology reports, divided  
601 into training, validation, and testing sets.

602

603 Figure 2: Sample input and output. (A) Zero-shot prompt and (B) Few-shot prompt for Llama  
604 models, illustrating the use of XML tags to delineate aortic measurement sites.

605

606 Figure 3: F1 Scores by Model. F1 scores for few-shot Llama 3.1, finetuned PubMedBERT +  
607 [NUM], and instruction-tuned Llama 3.1.

608

609 Figure 4: Ablation Study. Macro F1 scores by number of training samples: 10, 25, 50, 100, 214.



Chest CT reports 2013 to 2023 (n=363,423)

Excluded reports (n=6,733)

- CT protocols with <2,000 reports (n=6,697)
- CT reports without narratives (n=36)

Chest CT reports included in cohort (n=356,690)

- Total sentences: 6,960,729
- Sentences for inference: 74,483

Training set (n=1,002)

- Total sentences: 19,844
- Sentences in analysis: 214

Validation set (n=504)

- Total sentences: 9,505
- Sentences in analysis: 103

Test set (n=504)

- Total sentences: 9,664
- Sentences in analysis: 91

## A) Zero-shot prompt

### Input:

**Prompt:** You will be provided with CT scan narratives detailing CT scan findings. Your task is to tag diameter measurements of the thoracic aorta in the provided CT narrative using the provided tags. Format each measurement as follows: <tag>measurement</tag>. The tags for each aortic anatomic location are listed below...

**User:** The sinus of Valsalva is dilated, measuring 4.2 cm.

### Output:

**Assistant:** The sinus of Valsalva is dilated, measuring <SOV>4.2</SOV> cm.

## B) Few-shot prompt

### Input:

**Prompt:** You will be provided with CT scan narratives detailing CT scan findings. Your task is to tag diameter measurements of the thoracic aorta in the provided CT narrative using the provided tags. Format each measurement as follows: <tag>measurement</tag>. The tags for each aortic anatomic location are listed below...

**User:** Stably ectatic ascending aorta measuring up to 3.8 cm.

**Assistant:** Stably ectatic ascending aorta measuring up to <ASC>3.8</ASC> cm.

**User:** There is aneurysmal dilatation of the descending thoracic aorta measuring up to 3.5 cm.

**Assistant:** There is aneurysmal dilatation of the descending thoracic aorta measuring up to <DSC>3.5</DSC> cm.

**User:** The sinus of Valsalva is dilated, measuring 4.2 cm.

### Output:

**Assistant:** The sinus of Valsalva is dilated, measuring <SOV>4.2</SOV> cm.

F1 Scores by Model

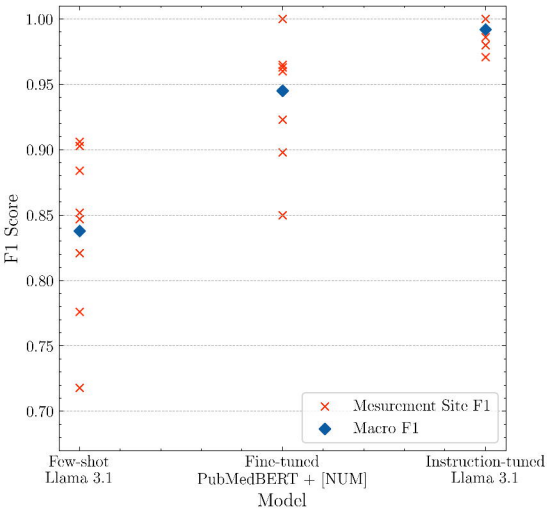

Macro F1 Scores by Number of Training Samples

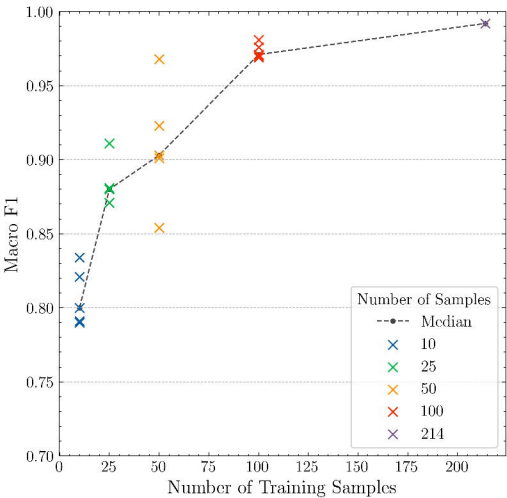

Source: https://medrxiv.org/content/10.1101/2024.12.23.24319567v1.full.pdf
